# Supplementary material
Source: Springer Nature journal article supplement (https://www.springermedizin.de/resource/supplementary/12888_2013_1429_MOESM1_ESM.pdf/9480214)
Supplement: MOESM1 [file 9480214]

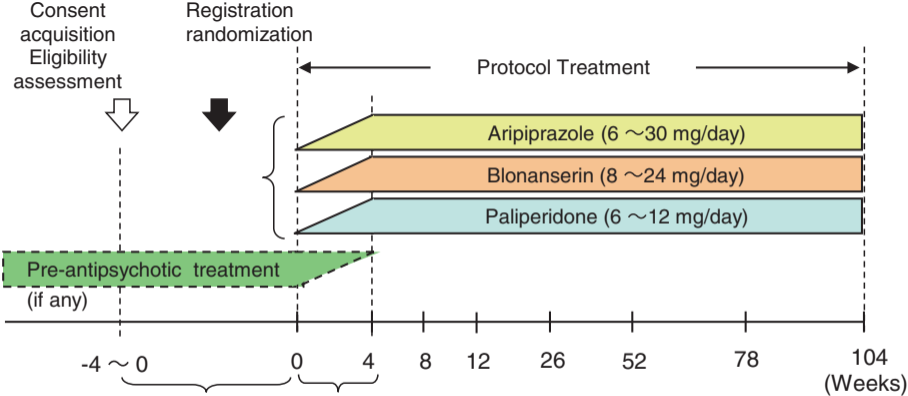

Protocol treatment starts within 4 weeks after eligibility assessment.

Dose-adjustment period (switching period): within 4 weeks, as rule (maximum of 8 weeks)
